# Supplementary material for: The Role of Female Reproductive Hormones in the Association between Migraine and Breast Cancer: An Unanswered Question
Source: MDPI journal article supplement (doi:10.3390/biomedicines11061613), 2023-06-01
Supplement: s1 [file s1]

# Supplementary Materials

**Table S1.** Association of hormone replacement therapy with BC risk and Mi incidence.

| HRT Type           | BC risk<br>RR (95% CI) [5] | Mi incidence<br>OR (95% CI) [9] |
|--------------------|----------------------------|---------------------------------|
| Estrogen only      | 1.30 (1.22–1.38)           | 1.70 (1.50– 1.92)               |
| Estrogen–progestin | 2.00 (1.91–2.09)           | 1.42 (1.25– 1.61)               |

Abbreviations: HRT, hormone replacement therapy; BC, breast cancer; Mi, migraine; RR, relative risk; OR, odds ratio; CI, confidence interval.
